# Supplementary material
Source: Research Square preprint supplement (doi:10.21203/rs.3.rs-9398108/v1)
Supplement: Supplementary file 1 [file dbdb7b6adfbcf863b5695ff3.docx]

**Additional Figure 1:** Representative immunofluorescence images showing microglia phenotypes prominent at the lesion sites at 3, 7, 14, 21, and 28 days post-injury (dpi). (A) Microglia were labeled with IBA1, and morphological phenotypes were classified and quantified within ipsilateral and contralateral fimbria at 3-28 dpi (**B**) Images were pre-processed in ImageJ prior to analysis and identified as amoeboid, hypertrophied, rod-like and ramified. (**C–F**) Quantification of distinct IBA1⁺ microglial morphologies in ipsilateral and contralateral fimbria across the post-injury time course (**G-J**) Quantification of distinct IBA1⁺ microglial morphologies in ipsilateral and contralateral LOT across the post-injury time course. Data is presented as mean ± SD. Statistical analysis was performed using two-way ANOVA followed by Tukey’s multiple comparisons test to assess differences across time points and within the lesion site (n = 4). Exact p values are indicated in the graphs.

**Additional Figure 2.** Extracellular matrix visualization at the fimbrial lesion site.(**A**) Representative immunofluorescence images showing double labeling for versican (green) and brevican (red) in the fimbria across the post-injury time course (3–28 dpi) following LPC or saline injection. Scale bar: 50 μm. The white square inset images show a higher magnification of the region surrounding the injection sites. Scale bar: 20 µm. Quantification of (**B**) versican and (**C**) brevican expression within the lesion site in the fimbria across different time points (3-28 dpi). Data is presented as mean ± SD. Statistical analysis was performed using two-way ANOVA followed by Tukey’s multiple comparisons test to assess differences across time points and within the lesion site (n = 4). Exact p values are indicated in the graphs.

**Additional Figure 3.** Extracellular matrix visualization at the lateral olfactory tract (LOT) lesion site (**A**) Representative immunofluorescence images showing double labeling for versican (green) and brevican (red) in the LOT across the post-injury time course (3–28 dpi) following LPC or saline injection. Scale bar: 50 μm. The white square inset images show a higher magnification of the region surrounding the injection sites. Scale bar: 20 µm. Quantification of (**B**) versican and (**C**) brevican expression within the lesion site in the LOT across different time points (3-28 dpi). Data is presented as mean ± SD. Statistical analysis was performed using two-way ANOVA followed by Tukey’s multiple comparisons test to assess differences across time points and within the lesion site (n = 4). Exact p values are indicated in the graphs.
